# Supplementary material for: Growth Performance and Recovery of Nosocomial Aspergillus spp. in Blood Culture Bottles
Source: MDPI journal article supplement (doi:10.3390/microorganisms10102026), 2022-10-13
Supplement: s1 [file s1]

**Table S1.** Comparison of “In house analytical strategy” with the current methods.

| Aspect of comparison                                                                                                                                              | Strategy                   |                             | Improvement                                |
|-------------------------------------------------------------------------------------------------------------------------------------------------------------------|----------------------------|-----------------------------|--------------------------------------------|
|                                                                                                                                                                   | Current method (2 Bottles) | In house 3 Bottles strategy |                                            |
| Growth of Aspergillus in bottles                                                                                                                                  | Yes                        | Yes                         | Equal                                      |
| % Recovery of Aspergillus onto Solid Media                                                                                                                        | < 35%                      | 100%                        | Efficiency and Reliability                 |
| Necessity to repeat the sample collection to evaluate fungal infection and use of a different approach as isolator tube                                           | Yes                        | No                          | Ease, Efficiency Reliability and Cheapness |
| Availability of a dedicated bottle for the complete recovery of Aspergillus separate from the “Blood culture set” used for the detection of other microorganisms. | No                         | Yes                         | Efficiency                                 |
| Days of complete procedure                                                                                                                                        | >4-5                       | <4                          | Efficiency and Reliability                 |
